# Supplementary material for: Structural and electronic properties of covalently functionalized 2-aminoethoxy-metallophthalocyanine–graphene hybrid materials: a computational study
Source: Royal Society of Chemistry journal article supplement (doi:10.1039/c5ra14628c), 2015-01-01
Supplement: c5ra14628c1.pdf [file c5ra14628c1.pdf]

## **Electronic Supplementary Information (ESI)**

# **Structural and electronic properties of covalently functionalized 2-aminoethoxy-metallophthalocyanine-graphene hybrid materials: a computational study†**

*Pabitra Narayan Samanta and Kalyan Kumar Das\**

## **RSC Advances**

*Department of Chemistry, Physical Chemistry Section, Jadavpur University, Kolkata 700 032, India.  
E-mail: [kkdas@chemistry.jdvu.ac.in](mailto:kkdas@chemistry.jdvu.ac.in)*

**Table S1** Comparison of the computed isotropic polarizabilities,  $\alpha$  (in a.u.) and average hyperpolarizabilities,  $\beta$  (in a.u.) of graphene, AEZnPc, and AEZnPc-graphene using three different meta-hybrid functionals.

| System          | $\alpha$ |           |        | $\beta$ |           |        |
|-----------------|----------|-----------|--------|---------|-----------|--------|
|                 | M06-2X   | CAM-B3LYP | wB97XD | M06-2X  | CAM-B3LYP | wB97XD |
| graphene        | 1165.5   | 1203.4    | 1283.9 | 2.6     | 2.9       | 3.9    |
| AEZnPc          | 649.5    | 659.0     | 666.3  | 1378.8  | 1388.9    | 1363.6 |
| AEZnPc-graphene | 1801.6   | 1850.9    | 1953.6 | 1926.0  | 1992.7    | 1920.8 |

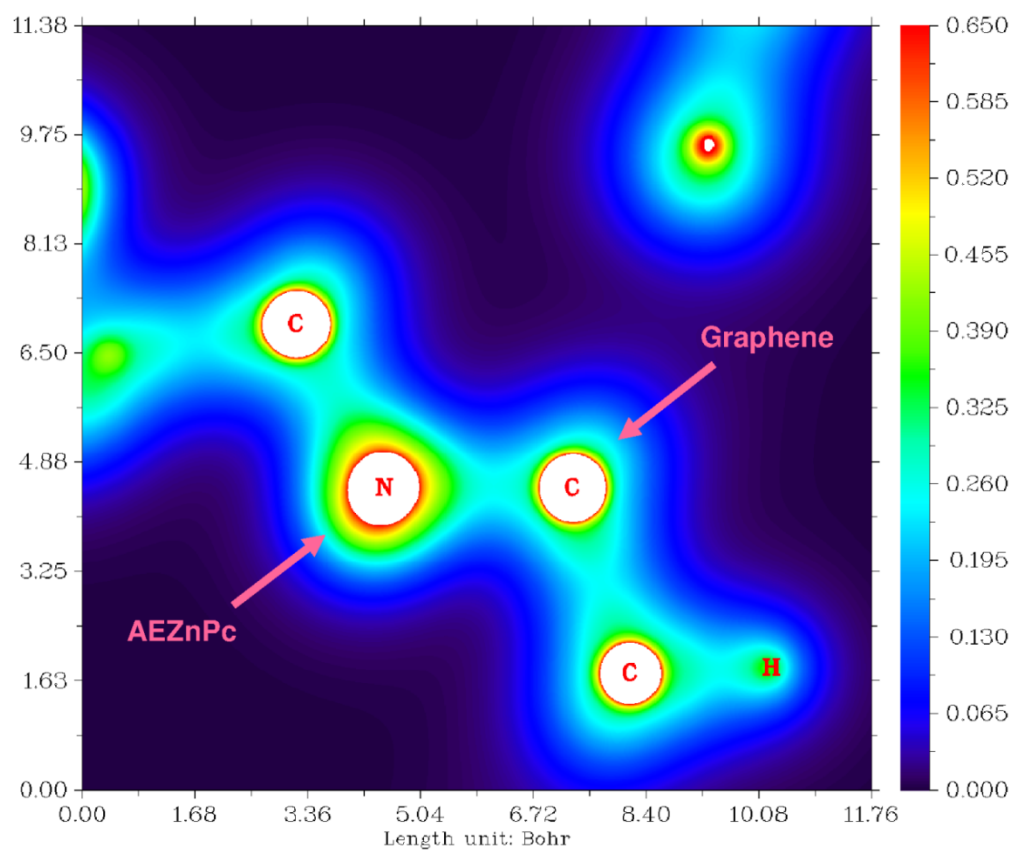

**Fig. S1** Color-filled electron density map of AEZnPc-graphene complex.

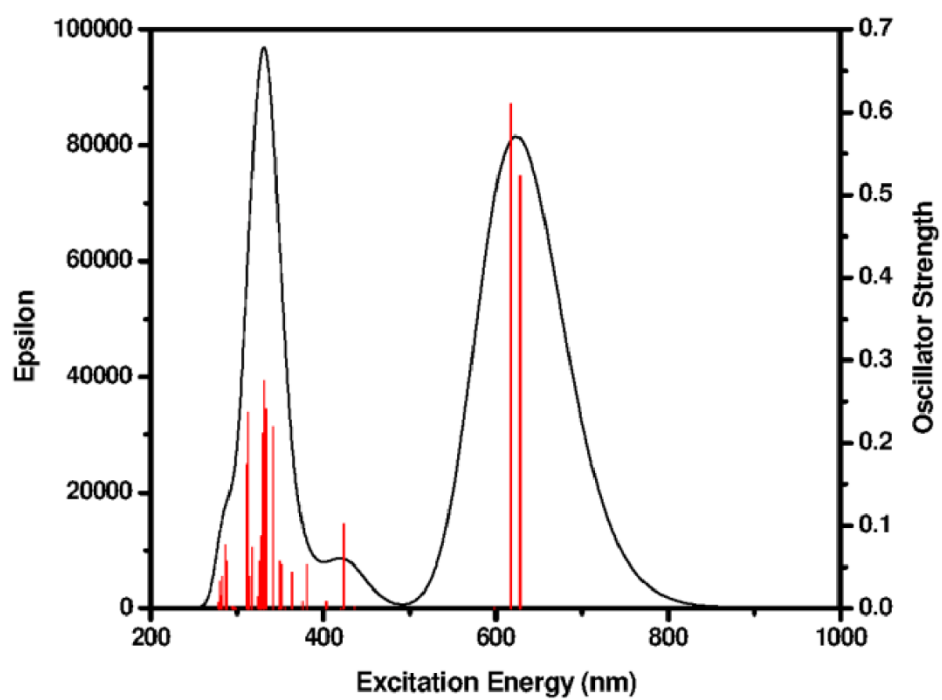

Fig. S2 Computed UV spectra of AENiPc in DMF solvent

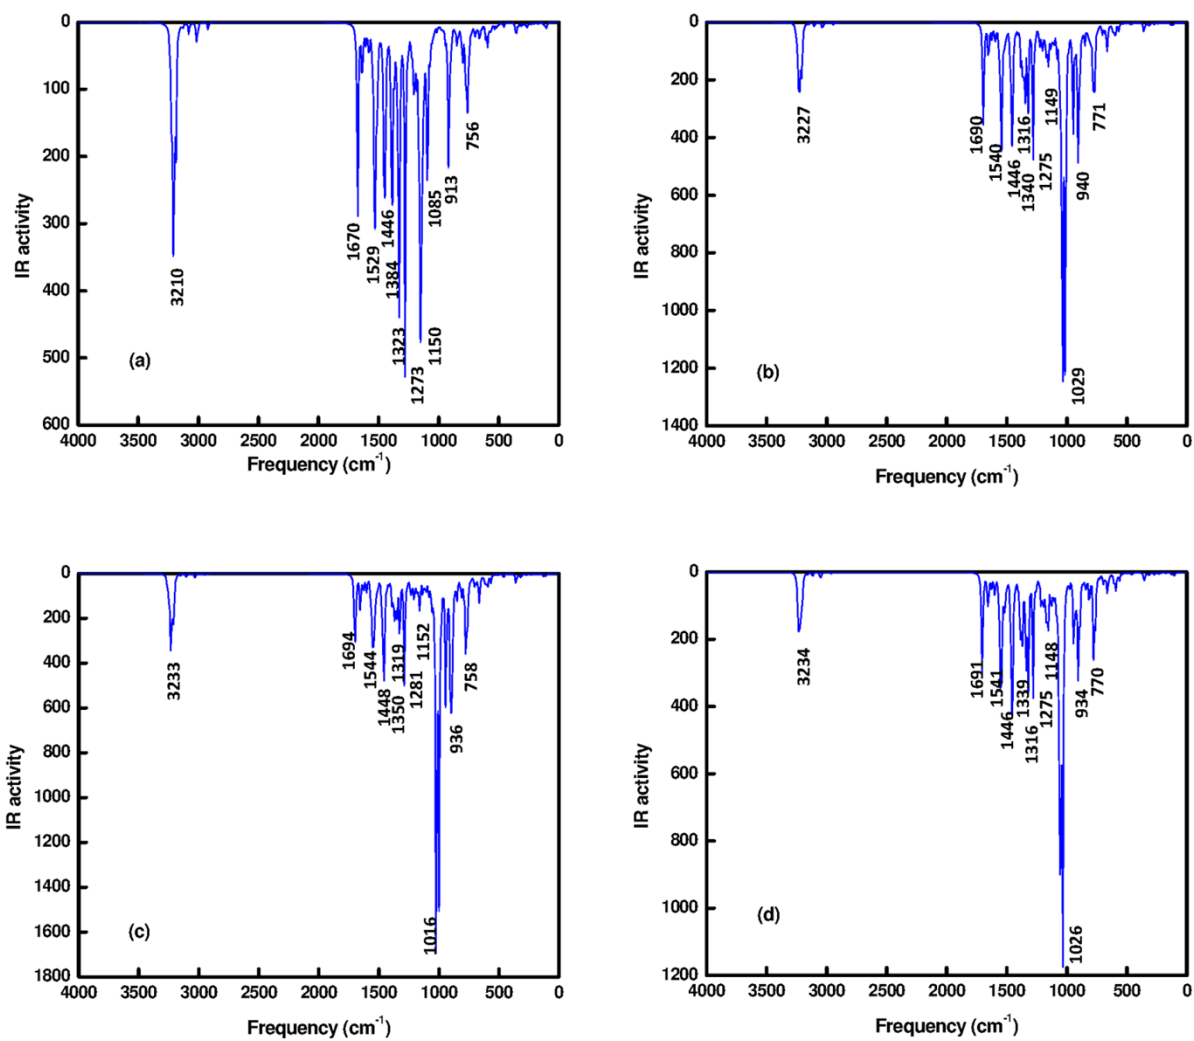

Fig. S3 Computed IR spectra of AEZnPc-graphene using different functionals: (a) B3LYP, (b) CAM-B3LYP, (c) wB97XD, (d) M06-2X

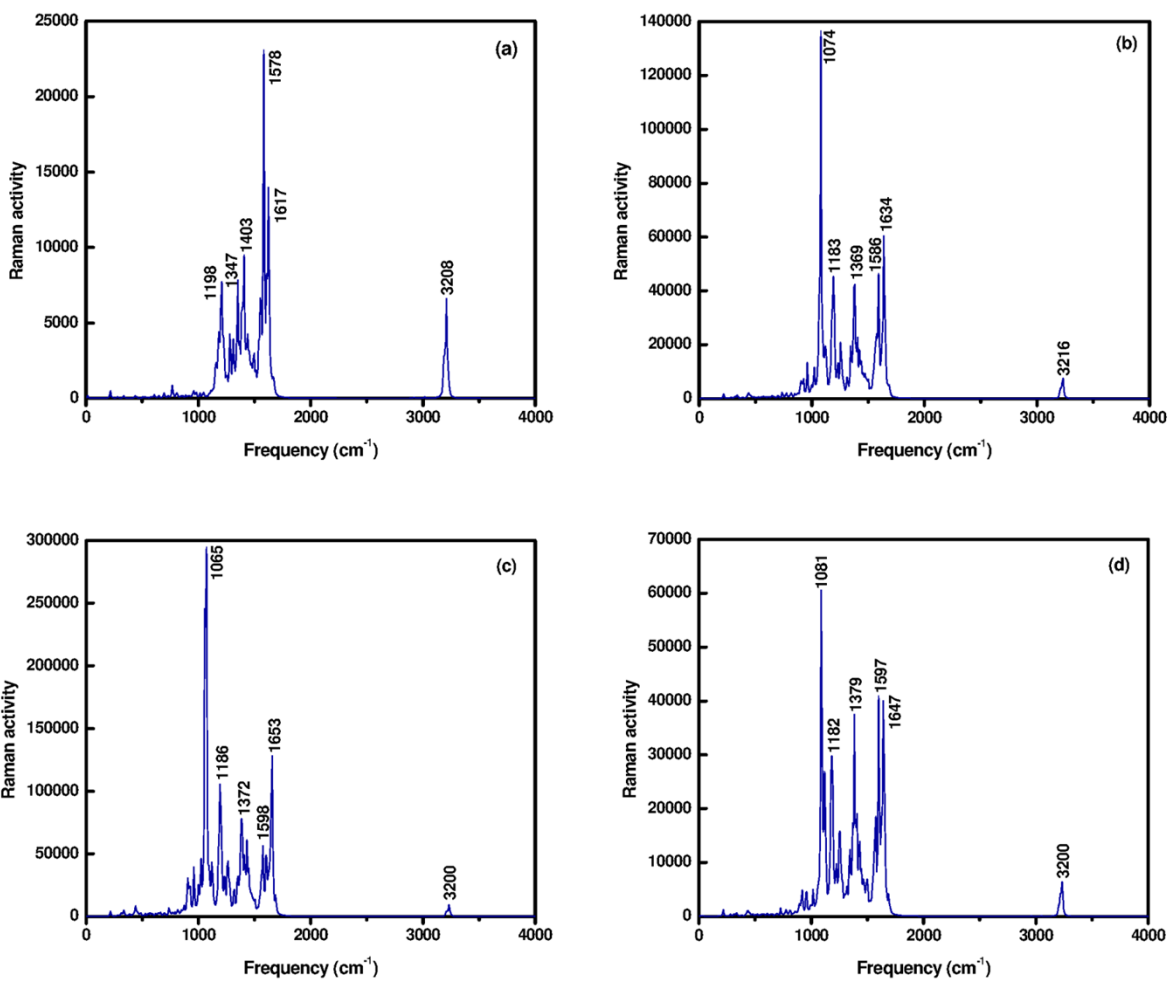

Fig. S4 Computed Raman activity of AEZnPc-graphene using different functionals: (a) B3LYP, (b) CAM-B3LYP, (c) wB97XD, (d) M06-2X
